# Supplementary material for: Acsl, the Drosophila ortholog of intellectual-disability-related ACSL4, inhibits synaptic growth by altered lipids
Source: Oxford University Press journal article supplement (doi:10.1242/jcs.195032), 2016-09-22
Supplement: jcs195032supp.pdf [file jcs195032supp.pdf]

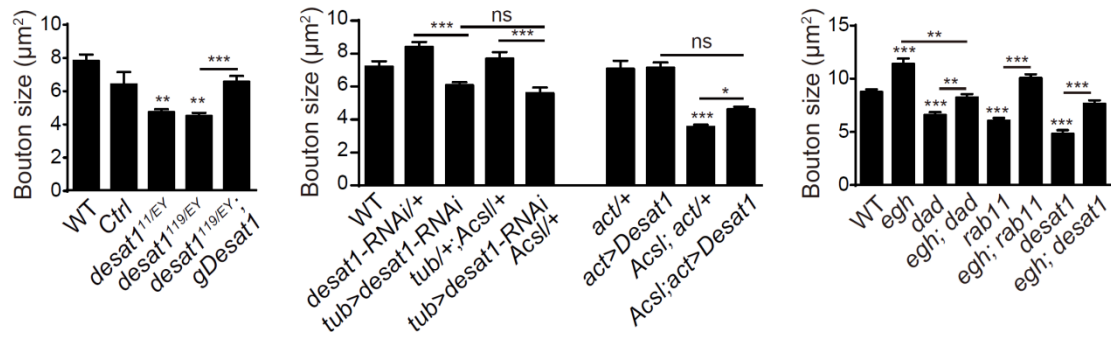

**Figure S1. Quantifications of NMJ bouton size.**

Quantifications of bouton size of NMJ4 in different genotypes.  $n \geq 12$  larvae; ns, no significance; \* $P < 0.05$ , \*\* $P < 0.01$ , \*\*\* $P < 0.001$  by one-way ANOVA with Tukey *post hoc* tests; error bars: s.e.m.

**Table S1: Lipidomic data of membrane lipids.**

**Ratio value:** ratios of lipid levels between the indicated genotypes to assess changes in lipid abundance; related to Fig. 5B,D,E. **Molecular fraction:** molar percentage (mol%) for each lipid class or species normalized to the sum of lipids measured; 5 biological repeats for each genotype; related to Fig. 3D and Fig. 5. **P-value:** comparison of each lipid class or species of indicated genotype to that of wild-type by ANOVA non-parametric Kruskal-Wallis sum-of-ranks;  $P < 0.05$  is highlighted by pink; related to Fig. 3D and Fig. 5.

[Click here to Download Table S1](#)
